# Supplementary material
Source: Research Square preprint supplement (doi:10.21203/rs.3.rs-9637193/v1)
Supplement: Supplementary file 1 [file cfb722489a2156d7c5b57b17.docx]

**Semi‑Structured Interview Guide**

**Project Title**

*Orientation and Induction: Diagnostic Radiography Students’ Experiences During Work‑Integrated Learning Clinical Placement*

**Interview Details**

- Interviewer:
- Interviewee:
- Date:
- Start time:
- End time:
- Duration:

**Participant Demographic Information**

(Collected at the beginning of the interview)

- Name
- Age
- Gender
- Degree enrolled in (Bachelor/Master)
- Number of clinical placements completed
- Types of placement sites attended (metropolitan, rural, private clinic)

**Preamble (Read to Participant)**

Thank you for agreeing to participate in this interview. The purpose of this study is to explore diagnostic radiography students’ experiences of orientation and induction during clinical placements. Your participation is voluntary, and you may skip any question or stop the interview at any time. With your permission, this interview will be audio‑recorded. All information will remain confidential and de‑identified in reporting. After this interview, please refrain from discussing the research project with others.

**Ice Breaker**

- “How has your day been so far?”

**Interview Questions**

*Semi‑structured; prompts used flexibly depending on participant responses*

**1. Initial Placement Experience**

- **First impressions** — Can you tell me about your experience when you first started your placement? **Prompts:**
- What stood out to you?
- How did you feel arriving on your first day?

**2. First Day at the Placement Site**

- **First day** — Can you recall what your first day at the placement site was like? **Prompts:**
- What happened when you arrived?
- Who did you meet?
- How did you feel during that first day?

**3. Understanding of Orientation and Induction**

- **Understanding onboarding** — What does the term orientation or induction mean to you in the context of clinical placement?

**Prompts:**

- How would you describe the purpose of orientation?
- What do you expect from an induction process?

**4. Orientation Received During Placement**

- **Orientation experience** — Can you describe the orientation you received at your placement site?

**Prompts:**

- What information or guidance were you given?
- Was anything unclear or missing?
- How helpful was the orientation in settling in?

**5. Transition From University to Clinical Environment**

- **Shift to clinical** — How did you find the shift from university practicals to working in a clinical environment?

**Prompts:**

- What felt familiar or unfamiliar?
- What challenges did you encounter?
- Did orientation help with this transition?

**6. Developing Confidence in the Clinical Environment**

- **Confidence point** — At what point did you start to feel confident or comfortable in the clinical environment?

**Prompts:**

- What contributed to that feeling?
- Were there moments that made you feel unsure?

**7. Readiness to Achieve Competencies**

- **Competency readiness** — When did you feel capable of beginning to achieve your radiography competencies?

**Prompts:**

- What helped you feel ready?
- Did orientation influence this in any way?

**Closing Question**

- **Final reflections** — Is there anything else you would like to share about your orientation or induction experiences during placement?
